# Supplementary material for: Dynamic behaviours of epoxy resin thin films during the curing process
Source: Royal Society of Chemistry journal article supplement (doi:10.1039/d2sm01500e), 2023-01-01
Supplement: d2sm01500e1.pdf [file d2sm01500e1.pdf]

## Supplementary information

### Dynamic behaviours of epoxy resin thin films during the curing process

Taiki Hoshino<sup>\*a,b,c</sup>, Yasushi Okamoto<sup>d</sup>, Atsushi Yamamoto<sup>d</sup>, Hiroyasu Masunaga<sup>e</sup>

<sup>a</sup> International Center for Synchrotron Radiation Innovation Smart (SRIS), Tohoku University, 2-1-1 Katahira, Aoba-ku, Sendai 980-8577, Japan

<sup>b</sup> Institute of Multidisciplinary Research for Advanced Materials (IMRAM), Tohoku University, 2-1-1 Katahira, Aoba-ku, Sendai 980-8577, Japan

<sup>c</sup> RIKEN SPring-8 Center, 1-1-1, Kouto, Sayo-cho, Sayo-gun, Hyogo 679-5148, Japan

<sup>d</sup> DENSO CORPORATION, 1-1, Showa-cho, Kariya, Aichi 448-8661, Japan

<sup>e</sup> Japan Synchrotron Radiation Research Institute/SPring-8, 1-1-1, Kouto, Sayo-cho, Sayo-gun, Hyogo 679-5198, Japan

\*Taiki Hoshino

Email: taiki.hoshino.c7@tohoku.ac.jp

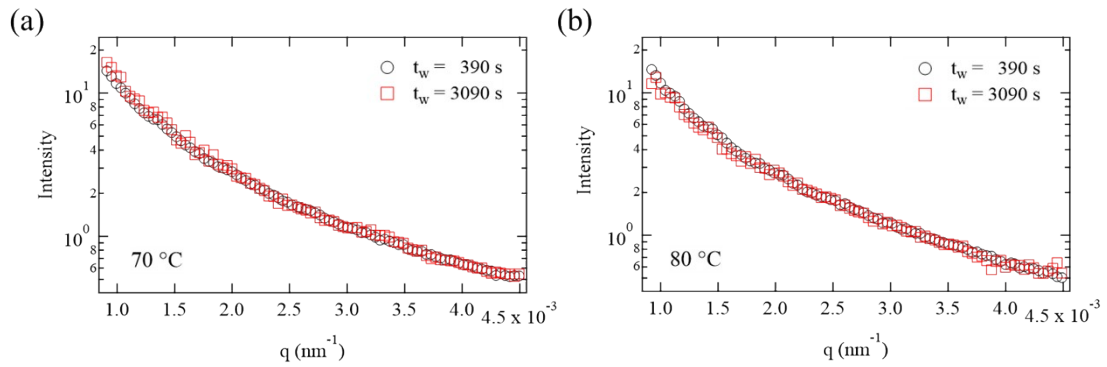

Figure S1. Scattering intensity profiles of the thin films obtained from the initial 100 images ( $t_w=390$  s) and the last 100 images ( $t_w=3090$  s) at 70 (a) and 80 C (b). No significant change in the scattering profiles depending on  $t_w$  were observed.

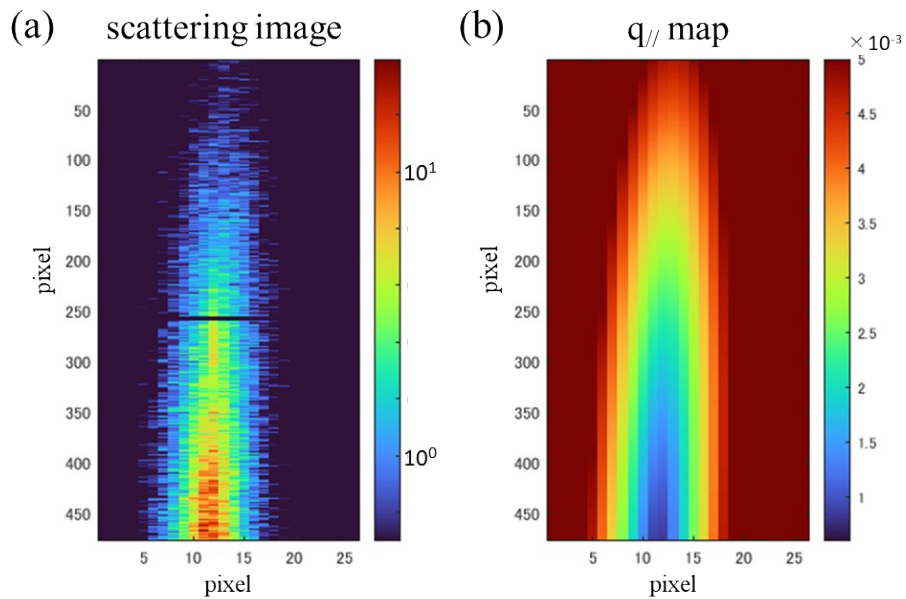

Figure S2. Two-dimensional profiles of scattering intensity obtained from the GI-XPCS measurement at 70 C for representative data (a), and the inplane component of the scattered wave vector ( $q_{//}$ ) (b).
